# Supplementary material for: Persistent Ethnicity-Associated Disparity in Antitumor Effectiveness of Immune Checkpoint Inhibitors Despite Equal Access
Source: PubMed Central journal article supplement (PMC9367161; doi:10.1158/2767-9764.crc-21-0143), 2022-08-15
Supplement: NIHMS1827597-supplement-1.pdf [file NIHMS1827597-supplement-1.pdf]

## Supplementary Data

**Supplementary Table 1.** Patient and treatment characteristics of ICI monotherapy cohort.

|                                     | <b>Black</b> | <b>White</b> | <b>Hispanic</b> |
|-------------------------------------|--------------|--------------|-----------------|
| <b>N</b>                            | 58           | 78           | 29              |
| <b>Age at diagnosis</b>             | 62.8         | 63.2         | 61.2            |
| <b>Age at ICI initiation</b>        | 64.3         | 65.4         | 62.3            |
| <b>Sex</b>                          |              |              |                 |
| Male                                | 47 (81.0)    | 61 (78.2)    | 17 (58.6)       |
| Female                              | 11 (19.0)    | 17 (21.8)    | 12 (41.4)       |
| <b>Smoking status*</b>              |              |              |                 |
| Yes                                 | 48 (82.8)    | 70 (89.7)    | 19 (65.5)       |
| Never smoker                        | 9 (15.5)     | 8 (10.3)     | 10 (34.5)       |
| Smoker at diagnosis                 | 14 (24.1)    | 31 (39.7)    | 7 (24.1)        |
| Unknown                             | 1 (1.7)      | 0 (0)        | 0 (0)           |
| <b>Alcohol</b>                      |              |              |                 |
| Yes                                 | 17 (29.3)    | 35 (44.9)    | 10 (34.5)       |
| No                                  | 36 (62.1)    | 33 (42.3)    | 19 (65.5)       |
| Unknown                             | 5 (8.6)      | 10 (12.8)    | 0 (0)           |
| <b>Cancer</b>                       |              |              |                 |
| Lung                                | 49 (84.5)    | 60 (76.9)    | 23 (79.3)       |
| Adenocarcinoma                      | 34 (69.4)    | 36 (60.0)    | 17 (73.9)       |
| Squamous                            | 13 (26.5)    | 15 (25.0)    | 6 (26.0)        |
| Small cell                          | 2 (4.1)      | 6 (10.0)     | 0 (0)           |
| NSCLC (NOS)                         | 0 (0)        | 3 (5.0)      | 0 (0)           |
| Head and neck SCC                   | 9 (18.4)     | 18 (23.1)    | 6 (20.7)        |
| <b>ECOG</b>                         |              |              |                 |
| 0                                   | 7 (12.1)     | 12 (15.4)    | 6 (20.7)        |
| 1                                   | 22 (37.9)    | 32 (41.0)    | 14 (48.3)       |
| 2                                   | 17 (29.3)    | 22 (28.2)    | 5 (17.2)        |
| 3                                   | 3 (5.2)      | 6 (7.7)      | 3 (10.3)        |
| 4                                   | 1 (1.7)      | 0 (0)        | 0 (0)           |
| Unknown                             | 8 (13.8)     | 6 (7.7)      | 1 (3.4)         |
| <b>Number of Metastasis*</b>        |              |              |                 |
| 0                                   | 8 (13.8)     | 11 (14.1)    | 4 (13.7)        |
| Contralateral lung only             | 4 (6.9)      | 2 (2.6)      | 5 (17.2)        |
| 1                                   | 17 (29.3)    | 37 (47.4)    | 1 (3.4)         |
| 2                                   | 21 (36.2)    | 14 (17.9)    | 15 (51.7)       |
| 3                                   | 4 (6.9)      | 11 (14.1)    | 3 (10.3)        |
| 4+                                  | 4 (6.9)      | 3 (3.8)      | 1 (3.4)         |
| Any brain metastasis                | 9 (15.5)     | 18 (23.1)    | 8 (27.6)        |
| <b>Prior systemic therapy (all)</b> |              |              |                 |
| 0                                   | 9 (15.5)     | 14 (17.9)    | 5 (17.2)        |
| 1                                   | 28 (48.3)    | 42 (53.8)    | 16 (55.2)       |
| 2                                   | 15 (25.9)    | 14 (17.9)    | 4 (13.8)        |
| 3                                   | 4 (6.9)      | 4 (5.1)      | 1 (3.4)         |
| 4+                                  | 2 (3.4)      | 4 (5.1)      | 3 (10.3)        |

**Prior systemic therapy  
(concurrent and adjuvant  
chemo excluded)**

|    |           |           |           |
|----|-----------|-----------|-----------|
| 0  | 12 (20.7) | 21 (26.9) | 6 (20.7)  |
| 1  | 29 (50.0) | 43 (55.1) | 15 (51.7) |
| 2  | 12 (20.7) | 7 (9.0)   | 4 (13.8)  |
| 3  | 3 (5.2)   | 3 (3.8)   | 1 (3.4)   |
| 4+ | 2 (3.4)   | 4 (5.1)   | 3 (10.3)  |

**ICI treatment**

|               |           |           |           |
|---------------|-----------|-----------|-----------|
| Nivolumab     | 36 (62.1) | 46 (59.0) | 15 (51.7) |
| Pembrolizumab | 22 (37.9) | 32 (41.0) | 14 (48.3) |

**Prior radiation anywhere\***

|     |           |           |           |
|-----|-----------|-----------|-----------|
| Yes | 39 (67.2) | 63 (80.8) | 17 (58.6) |
| No  | 19 (32.8) | 15 (19.2) | 12 (41.4) |

**PD-L1 status (NSCLC)**

|         |           |           |          |
|---------|-----------|-----------|----------|
| 0%      | 2 (4.3)   | 4 (7.4)   | 4 (17.4) |
| 1-49%   | 7 (14.9)  | 4 (7.4)   | 3 (13.0) |
| >50%    | 12 (25.5) | 14 (25.9) | 7 (30.4) |
| Unknown | 26 (55.3) | 32 (59.3) | 9 (39.1) |

\*p<0.05 for Hispanic vs. White

**Supplementary Figure 1. Patient and disease characteristics with significant differences among the race/ethnic groups for the entire cohort (ICI monotherapy and chemo/ICI combination therapy). A) Smoking status, B) alcohol consumption, and C) number of metastatic sites.**

**A.**

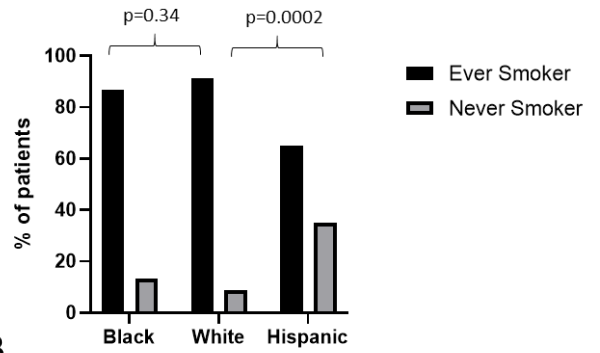

**B.**

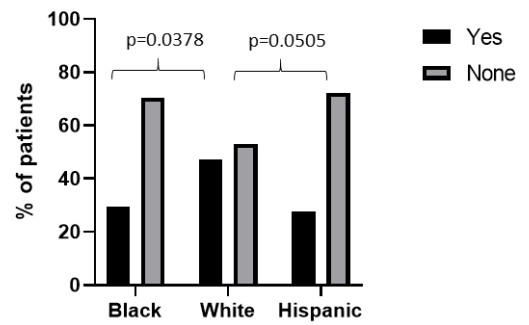

**C.**

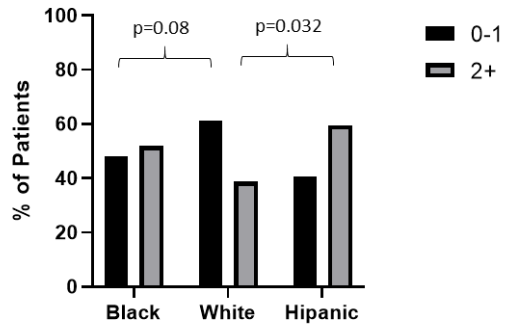

**Supplementary Figure 2. Cohort characteristics with significant differences among the race/ethnic groups for the ICI monotherapy cohort. A) Smoking status and B) number of metastatic sites.**

A.

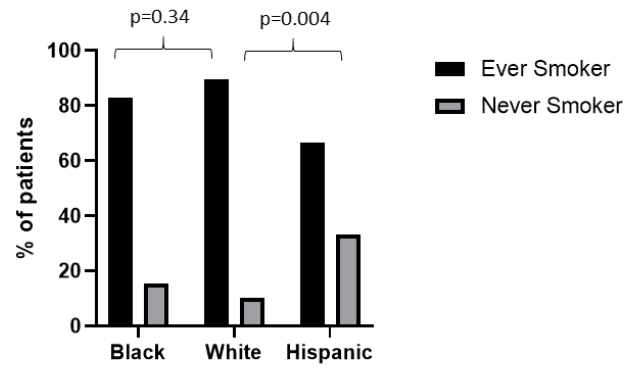

B.

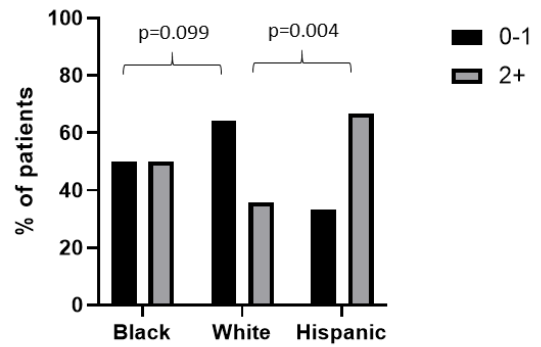

**Supplementary Figure 3. Radiation treatment differed significantly as a function of race/ethnicity. A) entire cohort and B) ICI monotherapy cohort.**

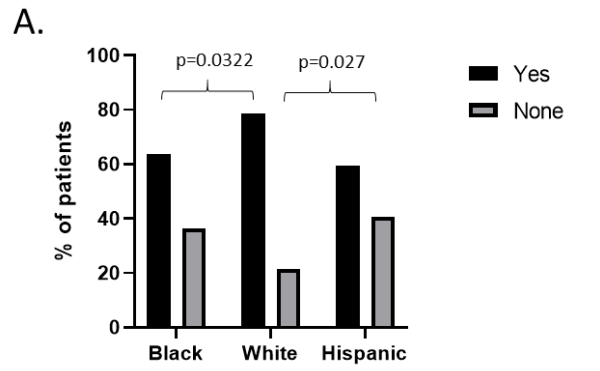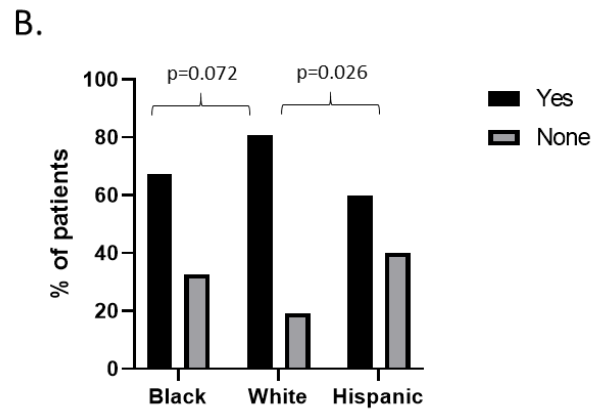

**Supplementary Figure 4. ORR as a function of cohort characteristics with significant differences among the race/ethnic groups for the entire cohort (ICI monotherapy and chemo/ICI combination therapy). A) Smoking status, B) alcohol consumption, C) number of metastatic sites, and D) history of radiation treatment. CR- complete response; PR- partial response; SD- stable disease; PD- progressive disease.**

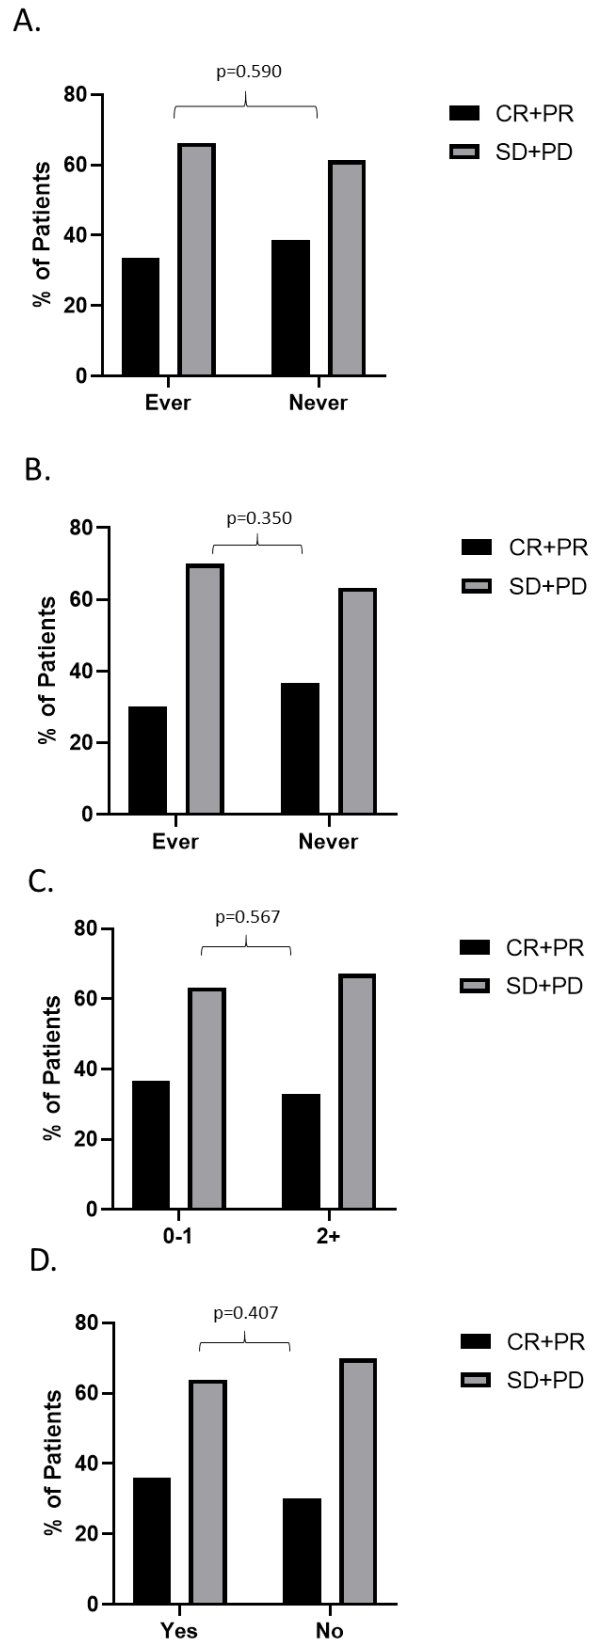

**Supplementary Figure 5. ORR as a function of cohort characteristics with significant differences among the race/ethnic groups for the ICI monotherapy cohort. A) Smoking status, B) number of metastatic sites, and C) history of radiation treatment. CR- complete response; PR- partial response; SD- stable disease; PD- progressive disease.**

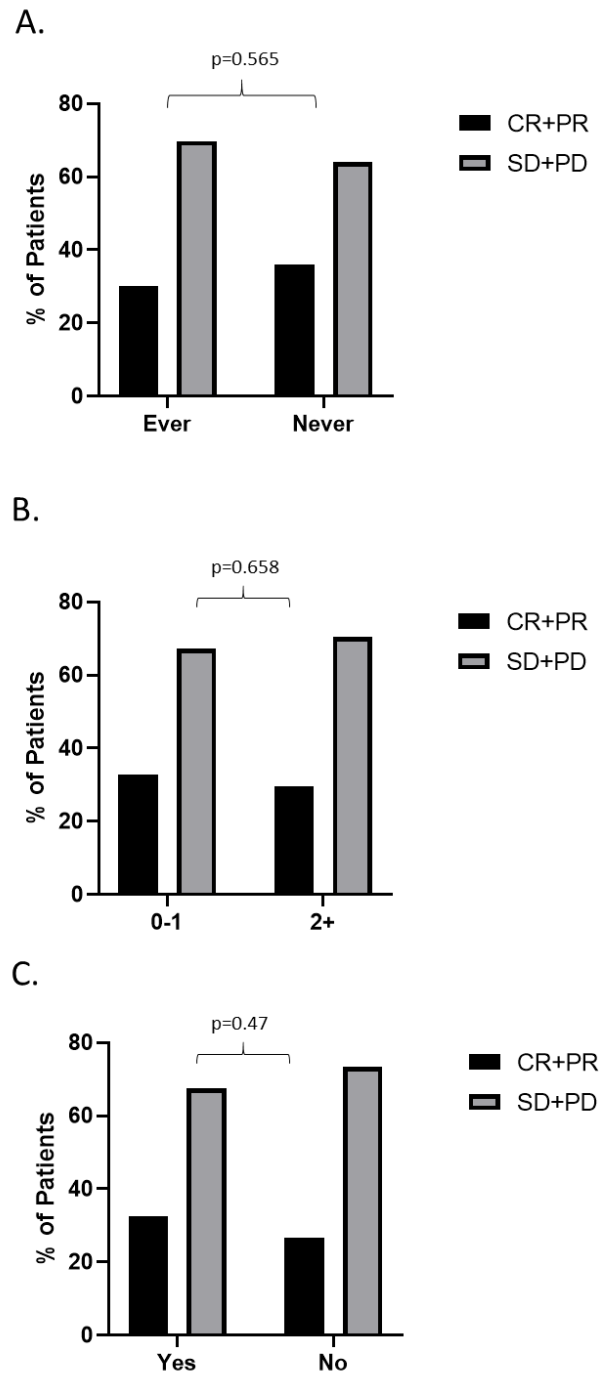

**Supplemental Figure 6: Toxicity and treatment type in the entire cohort. A) treatment type by race/ethnicity and B) toxicity by treatment type. P values were determined by two-sided Chi-square tests.**

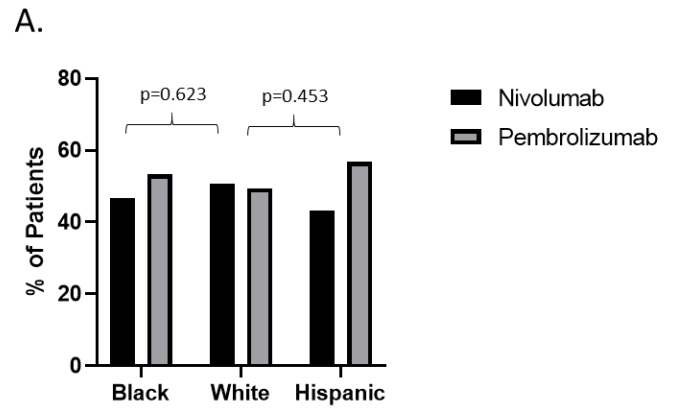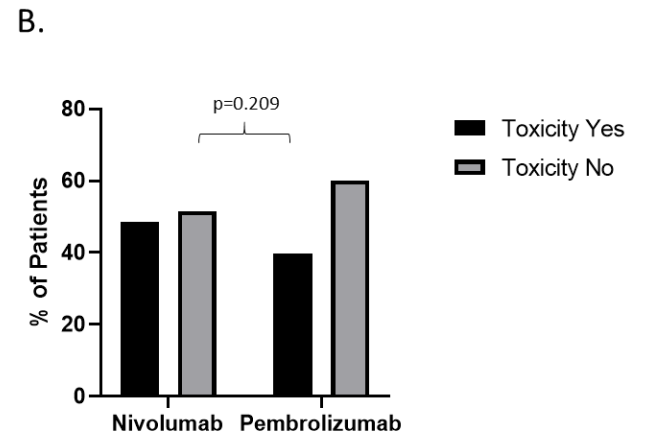



**Supplemental Figure 7: Toxicity and treatment type in the monotherapy cohort.** **A)** treatment type by race/ethnicity and **B)** toxicity by treatment type. P values were determined by two-sided Chi-square tests

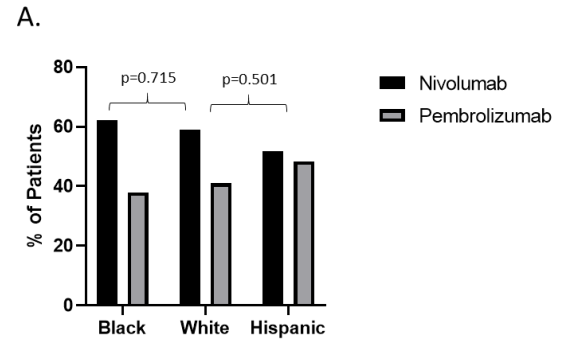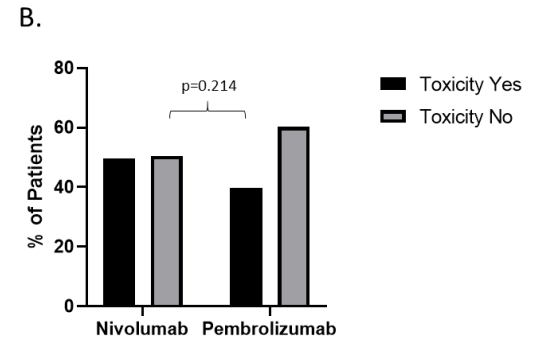

**Supplementary Table 2.** p16 status and response among oropharyngeal cancers by race/ethnicity.

| <u>Race/Ethnicity</u> | <u>p16 status</u> | <u>Response type</u> |
|-----------------------|-------------------|----------------------|
| Black                 | unknown           | Progression          |
| Black                 | unknown           | Progression          |
| White                 | p16+              | Partial response     |
| White                 | p16+              | Progression          |
| White                 | p16+              | Progression          |
| White                 | p16+              | Progression          |
| White                 | p16-              | Progression          |
| White                 | p16-              | Progression          |
| Hispanic              | p16+              | Progression          |

**Supplementary Table 3.** Severe irAEs resulting in steroid administration or ICI cessation with summary of specific severe irAEs.

|                                                           | <b><u>Black</u></b> | <b><u>White</u></b> | <b><u>Hispanic</u></b> |
|-----------------------------------------------------------|---------------------|---------------------|------------------------|
| <b>irAE requiring stop of IO and/or systemic steroids</b> | 15 (19.5)           | 16 (17.2)           | 6 (15.8)               |
| Stop/hold IO                                              | 10                  | 8                   | 4                      |
| Steroid only                                              | 5                   | 8                   | 2                      |
| <b>irAE type</b>                                          |                     |                     |                        |
| Ataxia                                                    | 2                   | 0                   | 0                      |
| Meningoencephalitis                                       | 1                   | 0                   | 0                      |
| Hypophysitis                                              | 0                   | 1                   | 0                      |
| Adrenal insufficiency                                     | 1                   | 1                   | 0                      |
| Pneumonitis                                               | 3                   | 3                   | 3                      |
| Tracheobronchitis                                         | 0                   | 1                   | 0                      |
| Colitis                                                   | 3                   | 3                   | 2                      |
| Hepatitis                                                 | 2                   | 2                   | 1                      |
| Renal Toxicity                                            | 0                   | 1                   | 0                      |
| Rash                                                      | 1                   | 2                   | 0                      |
| Shingles                                                  | 1                   | 0                   | 0                      |
| ITP                                                       | 1                   | 0                   | 0                      |
| Arthritis                                                 | 0                   | 2                   | 0                      |
